# Supplementary material for: Mitigating the Mistletoe Menace: Biotechnological and Smart Management Approaches
Source: MDPI journal article supplement (doi:10.3390/biology11111645), 2022-11-10
Supplement: s1 [file s1]

## Supplementary Information

| Potential MBCA candidates                            | Entity type/<br>common name              | Features and possibilities as MBCA                                                                                                                                  | Mistletoe target(s)                                                    | Mistletoe host(s)                                                                                                                                                                                                                                                                                                                           | Refs.              |
|------------------------------------------------------|------------------------------------------|---------------------------------------------------------------------------------------------------------------------------------------------------------------------|------------------------------------------------------------------------|---------------------------------------------------------------------------------------------------------------------------------------------------------------------------------------------------------------------------------------------------------------------------------------------------------------------------------------------|--------------------|
| <i>Acremonium kiliense</i> Grütz                     | Microbe: Fungi                           | Strong disease symptoms                                                                                                                                             | <i>Viscum album</i>                                                    | Crimean pine ( <i>Pinus nigra</i> )                                                                                                                                                                                                                                                                                                         | [217]              |
| <i>Alternaria alternata</i> (Fr.) Keissl.            | Microbe: Fungi                           | Strong disease symptoms                                                                                                                                             | <i>Viscum album</i>                                                    | Crimean pine ( <i>Pinus nigra</i> )                                                                                                                                                                                                                                                                                                         | [217]              |
| <i>Anarsia sagmatica</i> Meyr [Lep.: Gelechiidae]    | Insect: fruit fly                        | Larvae feeding on all foliar parts to completely destroy the host, well synchronized with flowering period of host, multivoltine having up to 4 generations a year. | <i>Dendrophthoe falcata</i> . L.f Ettingsh                             | As above                                                                                                                                                                                                                                                                                                                                    | [231]              |
| <i>Apion variegatum</i> Wenck [Apio: Apioninae]      | Insect: Weevil                           | Can make holes in the stems                                                                                                                                         | Yellow berried mistletoe ( <i>Loranthus europae</i> ), <i>V. album</i> | Fir tree ( <i>Abies alba</i> Mill.) sessile oak ( <i>Quercus petraea</i> /Matt./ Liebl.), pedunculate oak ( <i>Q. robur</i> L.), narrow-leaved ash ( <i>Fraxinus angustifolia</i> Vahl), common locust ( <i>Robinia pseudoacacia</i> L.), sycamore ( <i>Acer pseudoplatanus</i> L.) and black alder ( <i>Alnus glutinosa</i> /L./ Gaertn.). | [144]<br>[397,398] |
| <i>Bacillus megaterium</i>                           | Microbe: Bacteria                        | Showed pathogenic symptoms when injected into mistletoe, but not when sprayed.                                                                                      | <i>Viscum album</i>                                                    | Crimean pine ( <i>Pinus nigra</i> )                                                                                                                                                                                                                                                                                                         | [217]              |
| <i>Bacillus pumilus</i>                              | Microbe: Bacteria                        | Showed pathogenic symptoms when injected into mistletoe, but not when sprayed.                                                                                      | <i>Viscum album</i>                                                    | Crimean pine ( <i>Pinus nigra</i> )                                                                                                                                                                                                                                                                                                         | [217]              |
| <i>Burkholderia cepacia</i>                          | Microbe: Bacteria                        | Showed pathogenic symptoms when injected into mistletoe, but not when sprayed.                                                                                      | <i>Viscum album</i>                                                    | Crimean pine ( <i>Pinus nigra</i> )                                                                                                                                                                                                                                                                                                         | [217]              |
| <i>Cacopsylla visci</i> Curtis,1835 [Hemi:Psyllidae] | Insect: British bug, jumping plant louse | Monophagous on mistletoe, sap sucking                                                                                                                               | Yellow berried mistletoe ( <i>Loranthus europae</i> ), <i>V. album</i> | Fir tree ( <i>Abies alba</i> Mill.) sessile oak ( <i>Quercus petraea</i> /Matt./ Liebl.), pedunculate oak ( <i>Q. robur</i> L.), narrow-leaved ash                                                                                                                                                                                          | [144, 397—399]     |

|                                                                                   |                                  |                                                                                                                                                                                                                                                                                                                                                                        |                                                                                                     |                                                                                                                                                                                                                                                                                                                                             |                      |
|-----------------------------------------------------------------------------------|----------------------------------|------------------------------------------------------------------------------------------------------------------------------------------------------------------------------------------------------------------------------------------------------------------------------------------------------------------------------------------------------------------------|-----------------------------------------------------------------------------------------------------|---------------------------------------------------------------------------------------------------------------------------------------------------------------------------------------------------------------------------------------------------------------------------------------------------------------------------------------------|----------------------|
|                                                                                   |                                  |                                                                                                                                                                                                                                                                                                                                                                        |                                                                                                     | ( <i>Fraxinus angustifolia</i> Vahl), common locust ( <i>Robinia pseudoacacia</i> L.), sycamore ( <i>Acer pseudoplatanus</i> L.) and black alder ( <i>Alnus glutinosa</i> /L./ Gaertn.).                                                                                                                                                    |                      |
| <b><i>Caliciopsis arceuthobii</i> (formerly <i>Wallrothiella arceuthobii</i>)</b> | Microbe: Fungi                   | Attacks spring-flowering mistletoes, destroys fruits and seeds, can grow in vitro, potential is limited by large, annual variations of infection.                                                                                                                                                                                                                      | <i>Arceuthobium pusillum</i> , <i>A. americanum</i> , <i>A. douglasii</i> , and <i>A. vaginatum</i> | Western hemlock ( <i>Tsuga heterophylla</i> ), lodgepole pine ( <i>Pinus contorta</i> )                                                                                                                                                                                                                                                     | [197, 198, 255, 400] |
| <b><i>Carulaspis visci</i> Schrank, 1781 [<i>Dias: Carulaspis</i>]</b>            | Insect: Scale                    | Exclusively occurs on mistletoe, causes galls on leaf.                                                                                                                                                                                                                                                                                                                 | Yellow berried mistletoe ( <i>Loranthus europaeus</i> ), <i>V. album</i>                            | Fir tree ( <i>Abies alba</i> Mill.) sessile oak ( <i>Quercus petraea</i> /Matt./ Liebl.), pedunculate oak ( <i>Q. robur</i> L.), narrow-leaved ash ( <i>Fraxinus angustifolia</i> Vahl), common locust ( <i>Robinia pseudoacacia</i> L.), sycamore ( <i>Acer pseudoplatanus</i> L.) and black alder ( <i>Alnus glutinosa</i> /L./ Gaertn.). | [144] [397,398]      |
| <b><i>Celypha woodiana</i> Barret, 1882 [<i>Tort: Olethreutina</i>]</b>           | Insect: Mistletoe<br>Marble moth | Threatened insect, needs conservation as priority as for MBCA assessments.                                                                                                                                                                                                                                                                                             | <i>Viscum album</i>                                                                                 | Apple                                                                                                                                                                                                                                                                                                                                       | [238]                |
| <b><i>Ceratitella asiatica</i> Hardy [<i>Dipt.: Tephritidae</i>]</b>              | Insect: fruit fly                | Larvae Feeds on fruits, no natural enemies known, 2 generations a year.                                                                                                                                                                                                                                                                                                | <i>Dendrophthoe falcata</i> L.f<br>Ettingsh                                                         | As above                                                                                                                                                                                                                                                                                                                                    | [231]                |
| <b><i>Colletotrichum gloeosporioides</i> (Sacc.) Penz.</b>                        | Microbe: Fungi                   | Not host specific, appear as small, brown to black, necrotic lesions on the nodes of fruits and shoots, not recovered from endophytic system, easy, inexpensive culturing, germinates over a wide temperature range, disrupts development of mistletoe shoots, preventing reproduction. As attacks any time after shoot emergence, so flexible application scheduling. | <i>Arceuthobium</i> spp.,<br><i>Dendrophthoe falcata</i> L.f<br>Ettingsh                            | Western hemlock, Lodgepole pine                                                                                                                                                                                                                                                                                                             | [401—406]            |
| <b><i>Cylindrocarpon cylindroides</i></b>                                         | Microbe: Fungi                   | Destroys the endophytic system                                                                                                                                                                                                                                                                                                                                         | Dwarf Mistletoe<br><i>Arceuthobium tsugense</i>                                                     | Western hemlock                                                                                                                                                                                                                                                                                                                             | [211, 407]           |
| <b><i>Cylindrocarpon gillii</i></b>                                               | Microbe: Fungi                   | Causes anthracnose in shoots, needs climate matching as inconclusive                                                                                                                                                                                                                                                                                                   | Dwarf mistletoes<br><i>Arceuthobium americanum</i> ,                                                | Western hemlock, Lodgepole pine                                                                                                                                                                                                                                                                                                             | [197, 405]           |

|                                                             |                                        |                                                                                                                                             |                                                                                                                                                              |                                                                                                                                                                                                                                                                                                                                             |                     |
|-------------------------------------------------------------|----------------------------------------|---------------------------------------------------------------------------------------------------------------------------------------------|--------------------------------------------------------------------------------------------------------------------------------------------------------------|---------------------------------------------------------------------------------------------------------------------------------------------------------------------------------------------------------------------------------------------------------------------------------------------------------------------------------------------|---------------------|
|                                                             |                                        | results (from inoculating an isolate of a warm, dry climate to a cool, moist condition)                                                     | <i>A. douglasii</i> ,<br><i>A. tsugense</i> subsp. <i>tsugense</i>                                                                                           |                                                                                                                                                                                                                                                                                                                                             |                     |
| <i>Cytospora abietis</i> Sacc.                              | Microbe: fungi                         | Kills mistletoe-infected branches, infectivity needs assessment as occasionally also parasitizes non-mistletoe-infected branches.           | <i>Arceuthobium abietinum</i>                                                                                                                                | <i>Abies magnifica</i> A.Murr. and <i>Abies concolor</i> (Gord. & Glend.) Lindl.                                                                                                                                                                                                                                                            | [408]               |
| <i>Delias eucharis</i> Dr. [Lep.: Pieridae]                 | Insect: butterfly                      | Larvae Feeding on leaves, no alternate host.                                                                                                | <i>Dendrophthoe falcata</i> L.f Ettingsh, <i>Loranthus cordifolius</i>                                                                                       | As above                                                                                                                                                                                                                                                                                                                                    | [231]               |
| <i>Demarchus pubipennis</i> Jacoby [Col.: Chrysomelidae]    | Insect: beetle                         | Larvae Feeding on leaves, heavily damages host leaves, multivoltine having up to 4 generations a year.                                      | <i>Dendrophthoe falcata</i> L.f Ettingsh                                                                                                                     | As above                                                                                                                                                                                                                                                                                                                                    | [231]               |
| <i>Euzopherodes ephestialis</i> Hamps [Lep.: Pyralidae]     | Insect: snout moth                     | Larvae feeds on flowers, multivoltine with 5-6 generations a year.                                                                          | <i>Dendrophthoe falcata</i> L.f Ettingsh, <i>Arceuthobium oxycedri</i> (DC.) M. Bieb., <i>Korthalsella opuntia</i> (Thunb.) Merrill., <i>Viscum album</i> L. | <i>Acacia modesta</i> [22]                                                                                                                                                                                                                                                                                                                  | [231]               |
| <i>Gibberidea visci</i> (Fuckel)                            | Microbe: fungi                         | Facultative fungi                                                                                                                           | <i>Viscum album</i>                                                                                                                                          | Crimean pine ( <i>Pinus nigra</i> )                                                                                                                                                                                                                                                                                                         | [409]               |
| <i>Icerya purchase</i> (Maskell) [Hemi.: Monophlebidae]     | Insect: cottony-cushion scale          | Causes heavy infection on mistletoe, however MCBA potential is limited due to known off target infection possibly on citrus and other trees | <i>Viscum cruciatum</i> (red berried mistletoe)                                                                                                              | Olive tree ( <i>Olea europaea</i> )                                                                                                                                                                                                                                                                                                         | [240]               |
| <i>Ixapion variegatum</i> Wencker. 1864 [Apio: Apioninae]   | Insect: mistletoe beetle               | Lays eggs in mistletoe stem, kills buds                                                                                                     | <i>Viscum album</i>                                                                                                                                          | Apple                                                                                                                                                                                                                                                                                                                                       | [238, 410]          |
| <i>Mylothris sagala</i> Grose-Smith, 1886 [Lep.: Pieridae]  | Insect: Butterfly, dusky dotted border | Feeds on sap, oviposits on mistletoe                                                                                                        | Yellow berried mistletoe ( <i>Loranthus europae</i> s), <i>V. album</i> , <i>Loranthus freisiorum</i>                                                        | Fir tree ( <i>Abies alba</i> Mill.) sessile oak ( <i>Quercus petraea</i> /Matt./ Liebl.), pedunculate oak ( <i>Q. robur</i> L.), narrow-leaved ash ( <i>Fraxinus angustifolia</i> Vahl), common locust ( <i>Robinia pseudoacacia</i> L.), sycamore ( <i>Acer pseudoplatanus</i> L.) and black alder ( <i>Alnus glutinosa</i> /L./ Gaertn.). | [144]<br>[397, 398] |
| <i>Myrmex arizonicus</i> [Col.: Curculionidae: Conoderinae] | Insect: Ant-like Stem borer weevil     | Can make round exit holes in diameter in the stems, with larval galleries, can kill mistletoe shoots                                        | <i>P. villosum</i> , <i>Phoradendron</i> on oak (Santa Cruz County), <i>P. flavescens</i> (Pursh.) Nutt., <i>P.</i>                                          | Oak, <i>Quercus lobata</i> , <i>Juglans major</i> , <i>Juniperus</i> sp., <i>Prosopis</i> sp.                                                                                                                                                                                                                                               | [226]               |

|                                                                                                                     |                                                   |                                                                                                                                                                                                                                                        |                                                                                                                                                               |                                                                                                                                                                                                                                                                  |                 |
|---------------------------------------------------------------------------------------------------------------------|---------------------------------------------------|--------------------------------------------------------------------------------------------------------------------------------------------------------------------------------------------------------------------------------------------------------|---------------------------------------------------------------------------------------------------------------------------------------------------------------|------------------------------------------------------------------------------------------------------------------------------------------------------------------------------------------------------------------------------------------------------------------|-----------------|
|                                                                                                                     |                                                   |                                                                                                                                                                                                                                                        | <i>juniperinum tomentosum</i> Engelm., P.                                                                                                                     |                                                                                                                                                                                                                                                                  |                 |
| <i>Myrmex</i> sp.<br>[Col.: Curculionidae:<br>Conoderinae]                                                          | Insect: Stem<br>borer weevil                      | Can make round exit holes about 2 mm in diameter in the stems, with larval galleries, can kill mistletoe shoots                                                                                                                                        | <i>Phoradendron serotinum</i>                                                                                                                                 | Water oak ( <i>Quercus lobata</i> )                                                                                                                                                                                                                              | [225]           |
| <i>Neonectria neomacrospora</i>                                                                                     | Microbe: Fungi                                    | Selective to mistletoe infected host branches, invades host without wounding, proven pathogenicity, host girdling, reduces mistletoe shoot growth, rapid cankering, abundant sporulation, awaits MBCA formulation and delivery technology improvement. | <i>Arceuthobium tsugense</i> ,<br><i>A. occidentale</i>                                                                                                       | Western hemlock, <i>Pinus miricata</i> D.Don                                                                                                                                                                                                                     | [213, 405, 410] |
| <i>Pandoraea pulminicola</i>                                                                                        | Microbe: bacteria                                 | Showed pathogenic symptoms when injected into mistletoe, but not when sprayed.                                                                                                                                                                         | <i>Viscum album</i>                                                                                                                                           | Crimean pine ( <i>Pinus nigra</i> )                                                                                                                                                                                                                              | [217]           |
| <i>Phaeobotryosphaeria visci</i> Arx & E. Mull.<br>[Syn.: <i>Botryosphaeria visci</i> (Kalchbr.)]                   | Microbe: Fungi                                    | Induces chlorotic symptoms on leaves, complete destruction of mistletoe.                                                                                                                                                                               | <i>Viscum album</i>                                                                                                                                           | <i>Populus nigra</i> , <i>Acer saccharinum</i> , <i>A. pseudoplatanus</i>                                                                                                                                                                                        | [129, 411, 412] |
| <i>Pinalitus viscicola</i> Pumton, 1988 [syn: <i>Orthops viscicola</i> , <i>Lygus viscicola</i> ]<br>[Hemi:Miridae] | Insect: plant bug                                 | Monophagous on mistletoe, sap sucking                                                                                                                                                                                                                  | <i>Viscum album</i>                                                                                                                                           | Apple                                                                                                                                                                                                                                                            | [238, 399]      |
| <i>Pseudaulacaspis cockerelli</i> (Cooley) [Hemi.: Diaspididae]                                                     | Insect: False<br>oleander scales,<br>Scale insect | Infection on leaf and haustorial structures, no infection on host, higher density of flakes on mid-rib and veins in leaves. Requires further evaluation.                                                                                               | <i>Dendrophthoe falcata</i> L.f<br>Ettingsh                                                                                                                   | Cassia tree ( <i>Senna siamea</i> )                                                                                                                                                                                                                              | [37]            |
| <i>Sphaeropsis visci</i> Fr.                                                                                        | Microbe: fungi                                    | Facultative, found on mistletoe leaves and fruits                                                                                                                                                                                                      | <i>Phoradendron</i> spp.,<br><i>Dendrophthoe falcata</i> L.f<br>Ettingsh, <i>Viscum coloratum</i>                                                             | Various trees                                                                                                                                                                                                                                                    | [413-416]       |
| <i>Stugeta bowkeri</i> Trimen, 1864<br>[Lep.: Lycaenidae]                                                           | Insect: Butterfly,<br>Bowker's<br>Sapphire        | Feeds on sap, oviposits on mistletoe                                                                                                                                                                                                                   | Yellow berried mistletoe ( <i>Loranthus europae</i> ), <i>Viscum album</i> , <i>Viscum rotundifolium</i> , <i>Loranthus elegans</i> and <i>L. oleaefolius</i> | Fir tree ( <i>Abies alba</i> Mill.) sessile oak ( <i>Quercus petraea</i> /Matt./ Liebl.), pedunculate oak ( <i>Q. robur</i> L.), narrow-leaved ash ( <i>Fraxinus angustifolia</i> Vahl), common locust ( <i>Robinia pseudoacacia</i> L.), sycamore ( <i>Acer</i> | [144, 397, 398] |

|                                                                        |                |                                                                                                                                                                                                                             |                                                                                                                                                                                              |                                                                                   |               |
|------------------------------------------------------------------------|----------------|-----------------------------------------------------------------------------------------------------------------------------------------------------------------------------------------------------------------------------|----------------------------------------------------------------------------------------------------------------------------------------------------------------------------------------------|-----------------------------------------------------------------------------------|---------------|
|                                                                        |                |                                                                                                                                                                                                                             |                                                                                                                                                                                              | <i>pseudoplatanus</i> L.) and black alder ( <i>Alnus glutinosa</i> /L./ Gaertn.). |               |
| <i>Synanthedon loranthe</i><br>Kralicek, 1966<br>[Lep.: Sesiidae]      | Insect: Moth   | Sap feeding larvae.                                                                                                                                                                                                         | Yellow berried mistletoe ( <i>Loranthus europaeus</i> ), <i>V. album</i> , <i>Viscum album abietis</i> , <i>Viscum album austriacum</i> , <i>Viscum laxum</i> and <i>Loranthus europaeus</i> | As above and Scot pine.                                                           | [144,397-398] |
| <i>Timorus sarcophagoides</i><br>[Col.: Curculionidae:<br>Conoderinae] | Insect: Weevil | Lives exclusively on the mistletoe, exhibits evasive mimicry (potentially consistent efficacy as MBCA), pieces holes into mistletoe endophytic system during oviposition, life cycle matches with mistletoe flowering peak. | Parrot flower mistletoe ( <i>Psittacanthus robustus</i> )                                                                                                                                    | Not available                                                                     | [229, 228]    |
| <i>Zelleria loranthevora</i> Meyr.<br>[Lep.: Yponomeutidae]            | Insect: moth   | Larvae destroy flowers by feeding and boring, no alternate host known.                                                                                                                                                      | <i>Dendrophthoe falcata</i> L.f Ettingsh                                                                                                                                                     | As above                                                                          | [231]         |

**Table S1.** List of potential MBCAs yet known for some mistletoe genera. Note: *Dendrophthoe falcata* was formerly known as *Loranthus longiflorus*. Also, Lep.: Lepidoptera, Dipt.: Diptera; Col.: Coleoptera, Tort.: Tortricidae, Apion: Apionidae.
